# Supplementary material for: US Hospital Service Availability and New 340B Program Participation
Source: PubMed Central journal article supplement (PMC11069079; doi:10.1001/jamahealthforum.2024.0833), 2024-05-03
Supplement: jamahealthforum-e240833-s001.pdf [file jamahealthforum-e240833-s001.pdf]

## Supplemental Online Content

Owsley KM, Hasnain-Wynia R, Rooks RN, Tung GJ, Mays GP, Lindrooth RC. US Hospital Service Availability and New 340B Program Participation. *JAMA Health Forum*. Published online May 3, 2024. doi:10.1001/jamahealthforum.2024.0833

**eMethods 1.** American Hospital Association (AHA) Survey Services Definitions

**eMethods 2.** Centers for Disease Control and Prevention Social Vulnerability Index Measure

**eMethods 3.** Model Specification

**eTable 1.** Baseline Hospital and Market Characteristics by New vs Always 340B Participation and Hospital Ownership

**eTable 2.** Difference-in-Differences Estimates of Service Provisions Using a Balanced Panel

**eTable 3.** Difference-in-Differences Estimates Using Logistic Regression

**eTable 4.** Difference-in-Differences Estimates by Whether Hospital Offered Service at Start of the Study Period

**eReferences**

This supplemental material has been provided by the authors to give readers additional information about their work.

## eMethods 1. American Hospital Association (AHA) Survey Services Definitions

| Measure                    | Notes                                                                                                                                                                                                                                                                                                                                                                                                                                                                                                                                                                        |
|----------------------------|------------------------------------------------------------------------------------------------------------------------------------------------------------------------------------------------------------------------------------------------------------------------------------------------------------------------------------------------------------------------------------------------------------------------------------------------------------------------------------------------------------------------------------------------------------------------------|
| Substance use care         | Provides diagnostic and therapeutic services to patients with a medical illness characterized by clinically significant impairments in health, social function, and voluntary control over use of substances such as alcohol, prescription and non-prescription drugs. Substance use disorders range in severity, duration and complexity from mild to severe. Includes care for inpatient/residential treatment for patients whose course of treatment involves more intensive care than provided in an outpatient setting or where patient requires supervised withdrawal. |
| Burn care                  | Provides care to severely burned patients. Severely burned patients are those with any of the following: (1) second-degree burns of more than 25% total body surface area for adults or 20% total body surface area for children; (2) third-degree burns of more than 10% total body surface area; (3) any severe burns of the hands, face, eyes, ears, or feet; or (4) all inhalation injuries, electrical burns, complicated burn injuries involving fractures and other major traumas, and all other poor risk factors.                                                   |
| Inpatient psychiatric care | Provides acute or long-term care to patients with mental or emotional disorders, including patients admitted for diagnosis and those admitted for treatment of psychiatric disorders, on the basis of physicians' orders and approved nursing care plans. Long-term care may include intensive supervision to persons with chronic/severe mental illness.                                                                                                                                                                                                                    |
| Outpatient psychiatric     | Services provided by the hospital that offer immediate initial evaluation and treatment to patients with mental or emotional disorders. Provides medical care, including diagnosis and treatment, of psychiatric outpatients.                                                                                                                                                                                                                                                                                                                                                |
| Obstetrics                 | Services owned or provided by the hospital that is designated as either: (1) unit provides services for uncomplicated maternity and newborn cases; (2) unit provides services for uncomplicated cases, the majority of complicated problems, and special neonatal services; and (3) unit provides services for all serious illnesses and abnormalities and is supervised by a full-time maternal/fetal specialist.                                                                                                                                                           |
| Adult Cardiac Surgery      | Services which include the diagnosis and treatment of diseases and disorders involving the heart and circulatory system. Includes minimally invasive procedures that include surgery done with only a small incision or no incision at all, such as through a laparoscope or an endoscope and more invasive major surgical procedures that include open chest and open heart surgery.                                                                                                                                                                                        |
| Orthopedic                 | Services provided for the prevention or correction of injuries or disorders of the skeletal system and associated muscles.                                                                                                                                                                                                                                                                                                                                                                                                                                                   |
| Oncology                   | Inpatient and outpatient services for patients with cancer, including comprehensive care, support and guidance in addition to patient                                                                                                                                                                                                                                                                                                                                                                                                                                        |

|                         |                                                                                                                                                                                                                                                                                                                                                                                                                           |
|-------------------------|---------------------------------------------------------------------------------------------------------------------------------------------------------------------------------------------------------------------------------------------------------------------------------------------------------------------------------------------------------------------------------------------------------------------------|
|                         | education and prevention, chemotherapy, counseling, and other treatment methods.                                                                                                                                                                                                                                                                                                                                          |
| Neurological            | Services provided by the hospital dealing with the operative and nonoperative management of disorders of the central, peripheral, and autonomic nervous systems.                                                                                                                                                                                                                                                          |
| Neonatal Intensive Care | A unit that must be separate from the newborn nursery providing intensive care to all sick infants including those with the very lowest birth weights (less than 1500 grams). NICU has potential for providing mechanical ventilation, neonatal surgery, and special care for the sickest infants born in the hospital or transferred from another institution. A full-time neonatologist serves as director of the NICU. |

## **eMethods 2. Centers for Disease Control and Prevention Social Vulnerability Index Measure**

Analyses included a categorical variable for community-level social vulnerability, a significant factor in poor health and well-being outcomes.<sup>1-3</sup> The Centers for Disease Control and Prevention Social Vulnerability Index (SVI) was used to measure community social vulnerability. We obtained this variable using data from the Agency for Healthcare Research and Quality Social Determinants of Health Database.<sup>4</sup> SVI is constructed using fifteen social factors to rank counties by four distinct categories: socioeconomic status (below poverty, unemployment, income, no high school diploma); household composition and disability (aged 65 or older, aged 17 or younger, disability, single-parent household); minority status and language (racial or ethnic minority group, English language comprehension); and transportation and housing type (multi-unit housing structure, mobile home, crowded housing, vehicle access, group quarters).<sup>5</sup> Each census tract is ranked based on percentiles ranging from 0 to 1 for the four subthemes and overall vulnerability index, with higher values indicating greater vulnerability. We linked county-level SVI to the hospital dataset using county FIPS codes. We then categorized hospitals into SVI terciles (low, medium, and high SVI).

### eMethods 3. Model Specification

In all analyses, we use the Callaway and Sant’Anna approach to adjust for the staggered treatment initiation of 340B participation using the CSDID STATA package.<sup>6</sup> This approach estimates all 2X2 difference-in-differences parameters for each treatment-timing group to obtain a “cohort-time average treatment effect”, allowing for heterogeneity across treatment cohort groups.<sup>7</sup> We present this aggregated treatment effect for all analyses except the event study and the logit specification (eTable 3). Our specification includes hospital and time fixed effects. Standard errors were clustered at the hospital-level. The primary specification is as follows:

$$SERV_{ht} = \alpha_h + \beta_1 New340B_{ht} + \delta_t + X_{ht} + \varepsilon_{ht} \quad (1)$$

where ‘*h*’ denotes hospital and ‘*t*’ denotes calendar year.  $SERV_{ht}$  is service availability for hospital ‘*h*’ in calendar year ‘*t*’,  $\alpha_h$  is a hospital fixed effect,  $New340B_{ht}$  is equal to one if hospital ‘*h*’ participates in the 340B program in calendar year ‘*t*’. The vector of control variables,  $X_{ht}$ , includes time-varying hospital and market-level controls listed in Table 1 of the manuscript and  $\delta_t$  is a calendar year fixed effect. The coefficient,  $\beta_1$ , measures the average change in service availability relative to never participating hospitals.

We also estimated an event study specification to assess the trends before and after an acquisition. For the event study results, the approach estimates the dynamic treatment effects across each year relative to 340B participation, across all cohorts. We used the ‘LONG2’ option in the CSDID package to calculate dynamic treatment effect estimates using the year before participation (*t*-1) as a reference period. The specification is identical to Equation 1 except the model includes leads and lags of treatment to indicate the number of years a hospital is from the 340B participation year:

$$SERV_{ht} = \alpha_h + \sum_{j=0}^5 \beta_j (Lag\ j)_{ht} + \sum_{k=1}^5 \gamma_k (Lead\ k)_{ht} + \delta_t + X_{ht} + \varepsilon_{ht} \quad (2)$$

**eTable 1. Baseline Hospital and Market Characteristics by New vs Always 340B Participation and Hospital Ownership**

|                                        | No. (%) or Mean (SD)                      |                                           |                |                                           |                                           |                |
|----------------------------------------|-------------------------------------------|-------------------------------------------|----------------|-------------------------------------------|-------------------------------------------|----------------|
|                                        | Not-for-profit Hospitals                  |                                           |                | Public Hospitals                          |                                           |                |
|                                        | New 340B Hospitals from 2012-2018 (n=762) | Always 340B Hospitals Before 2012 (n=851) | <i>P</i> value | New 340B Hospitals from 2012-2018 (n=312) | Always 340B Hospitals Before 2012 (n=309) | <i>P</i> value |
| <b><i>Hospital Characteristics</i></b> |                                           |                                           |                |                                           |                                           |                |
| No. of Admissions                      |                                           |                                           |                |                                           |                                           |                |
| <1000                                  | 198 (26.0%)                               | 216 (25.4%)                               | .033           | 185 (59.3%)                               | 155 (50.2%)                               | .04            |
| 1000-9999                              | 300 (39.4%)                               | 385 (45.2%)                               |                | 85 (27.2%)                                | 113 (36.6%)                               |                |
| 10,000+                                | 264 (34.6%)                               | 250 (29.4%)                               |                | 42 (13.5%)                                | 41 (13.3%)                                |                |
| Critical Access Designation            | 252 (33.1%)                               | 354 (41.6%)                               | <.001          | 199 (63.8%)                               | 188 (60.8%)                               | .45            |
| Multi-hospital System                  | 540 (70.9%)                               | 620 (72.9%)                               | .375           | 108 (34.6%)                               | 101 (32.7%)                               | .61            |
| Teaching Hospital                      | 72 (9.4%)                                 | 82 (9.6%)                                 | .899           | 25 (8.0%)                                 | 14 (4.5%)                                 | .07            |
| Top Quartile Medicaid share            | 343 (45.0%)                               | 382 (44.9%)                               | .960           | 122 (39.1%)                               | 123 (39.8%)                               | .86            |
| Top Quartile Medicare share            | 187 (24.5%)                               | 204 (24.0%)                               | .790           | 155 (49.7%)                               | 120 (38.8%)                               | .007           |
| Case Mix Index, mean (SD)              | 1.483 (0.214)                             | 1.474 (0.284)                             | .484           | 1.457 (0.208)                             | 1.333 (0.288)                             | <.001          |
| <b><i>Market Characteristics</i></b>   |                                           |                                           |                |                                           |                                           |                |
| Herfindahl-Hirschman Index, mean (SD)  | 0.186 (0.148)                             | 0.179 (0.137)                             | .330           | 0.184 (0.137)                             | 0.192 (0.144)                             | .52            |
| For-profit Market Share                | 0.086 (0.124)                             | 0.080 (0.114)                             | .349           | 0.161 (0.158)                             | 0.136 (0.148)                             | .04            |
| Social Vulnerability Index             |                                           |                                           |                |                                           |                                           |                |
| Bottom tercile                         | 203 (26.6%)                               | 266 (31.3%)                               | .063           | 90 (28.8%)                                | 96 (31.1%)                                | .58            |
| Middle tercile                         | 254 (33.3%)                               | 286 (33.6%)                               |                | 90 (28.8%)                                | 95 (30.7%)                                |                |
| Top tercile                            | 305 (40.0%)                               | 299 (35.1%)                               |                | 132 (42.3%)                               | 118 (38.2%)                               |                |
| Median Income (\$1,000), mean (SD)     | 46.4 (10.53)                              | 44.3 (9.8)                                | <.001          | 44.3 (9.7)                                | 42.5 (8.7)                                | .01            |
| Percent Uninsured, mean (SD)           | 16.6 (5.5)                                | 17.0 (5.0)                                | .114           | 19.4 (5.6)                                | 19.2 (5.6)                                | .76            |
| Percent White, mean (SD)               | 80.8 (17.1)                               | 81.9 (16.7)                               | .159           | 82.6 (16.5)                               | 81.8 (16.3)                               | .51            |
| Percent Above Age 65, mean (SD)        | 14.8 (3.9)                                | 14.7 (3.6)                                | .435           | 15.7 (4.6)                                | 15.4 (3.9)                                | .48            |
| Drug Death Rate, mean (SD)             | 15.0 (6.7)                                | 14.7 (7.4)                                | .456           | 16.2 (6.9)                                | 15.8 (7.3)                                | .47            |
| Rural                                  | 389 (51.0%)                               | 523 (61.5%)                               | <.001          | 146 (46.8%)                               | 134 (43.4%)                               | .03            |

|                         |             |             |      |             |             |     |
|-------------------------|-------------|-------------|------|-------------|-------------|-----|
| State expanded Medicaid | 542 (71.1%) | 610 (71.7%) | .807 | 166 (53.2%) | 175 (56.6%) | .39 |
|-------------------------|-------------|-------------|------|-------------|-------------|-----|

Notes: The statistics represent either the mean (standard deviation) or number (percent). Hospitals' first observation year in the dataset was used for New 340B hospitals. Always 340B hospital observations were in 2010. New 340B hospitals represent hospitals that began participating in the 340B program from 2012-18. Always 340B participating hospitals represent those that participated in the before 2012. The p-value indicates the difference between new and always 340B hospitals using student t-tests for continuous and chi-squared tests for binary variables.

**eTable 2. Difference-in-Differences Estimates of Service Provisions Using a Balanced Panel**

|                                    | Difference-in-Differences Estimate <sup>a</sup> (95% CI) <sup>b</sup> |                                               |                                       |
|------------------------------------|-----------------------------------------------------------------------|-----------------------------------------------|---------------------------------------|
|                                    | Overall<br>(n=1,157) <sup>c</sup><br>(1)                              | By Hospital Ownership                         |                                       |
|                                    |                                                                       | Not-for-Profit<br>(n=990) <sup>c</sup><br>(2) | Public<br>(n=167) <sup>c</sup><br>(3) |
| <b>Total Unprofitable Services</b> | 0.049                                                                 | 0.019                                         | 0.162                                 |
|                                    | (-0.014 - 0.111)                                                      | (-0.044 - 0.082)                              | (-0.019 - 0.343)                      |
|                                    | <i>P</i> =.13                                                         | <i>P</i> =.56                                 | <i>P</i> =.08                         |
| <b>Any Unprofitable Services</b>   | 0.008                                                                 | 0.011                                         | -0.016                                |
|                                    | (-0.013 - 0.030)                                                      | (-0.009 - 0.031)                              | (-0.086 - 0.054)                      |
|                                    | <i>P</i> =.45                                                         | <i>P</i> =.28                                 | <i>P</i> =.65                         |
| <i>Substance Use</i>               | 0.013                                                                 | 0.004                                         | 0.039                                 |
|                                    | (-0.011 - 0.038)                                                      | (-0.021 - 0.030)                              | (-0.025 - 0.102)                      |
|                                    | <i>P</i> =.28                                                         | <i>P</i> =.73                                 | <i>P</i> =.24                         |
| <i>Inpatient Psychiatric</i>       | 0.003                                                                 | -0.014                                        | 0.032                                 |
|                                    | (-0.024 - 0.029)                                                      | (-0.039 - 0.012)                              | (-0.057 - 0.121)                      |
|                                    | <i>P</i> =.84                                                         | <i>P</i> =.29                                 | <i>P</i> =.48                         |
| <i>Outpatient Psychiatric</i>      | 0.023                                                                 | 0.018                                         | 0.091                                 |
|                                    | (-0.012 - 0.058)                                                      | (-0.018 - 0.055)                              | (-0.026 - 0.207)                      |
|                                    | <i>P</i> =.20                                                         | <i>P</i> =.32                                 | <i>P</i> =.13                         |
| <i>Burn Care</i>                   | -0.004                                                                | -0.007                                        | 0.011                                 |
|                                    | (-0.018 - 0.011)                                                      | (-0.023 - 0.008)                              | (-0.032 - 0.055)                      |
|                                    | <i>P</i> =.62                                                         | <i>P</i> =.34                                 | <i>P</i> =.61                         |
| <i>Obstetrics</i>                  | 0.015                                                                 | 0.018                                         | 0.016                                 |
|                                    | (-0.002 - 0.032)                                                      | (-0.002 - 0.038)                              | (-0.038 - 0.069)                      |
|                                    | <i>P</i> =.08                                                         | <i>P</i> =.07                                 | <i>P</i> =.56                         |
| <b>Total Profitable Services</b>   | 0.017                                                                 | 0.035                                         | -0.141                                |
|                                    | (-0.039 - 0.073)                                                      | (-0.023 - 0.093)                              | (-0.357 - 0.074)                      |
|                                    | <i>P</i> =.54                                                         | <i>P</i> =.24                                 | <i>P</i> =.20                         |
| <b>Any Profitable Services</b>     | -0.001                                                                | 0.011                                         | -0.114                                |
|                                    | (-0.015 - 0.013)                                                      | (0.001 - 0.020)                               | (-0.211 - -0.016)                     |
|                                    | <i>P</i> =.88                                                         | <i>P</i> =.03                                 | <i>P</i> =.02                         |
| <i>Cardiac Surgery</i>             | -0.012                                                                | -0.014                                        | -0.008                                |
|                                    | (-0.025 - 0.002)                                                      | (-0.029 - 0.001)                              | (-0.064 - 0.048)                      |
|                                    | <i>P</i> =.10                                                         | <i>P</i> =.06                                 | <i>P</i> =.79                         |
| <i>Orthopedic</i>                  | -0.001                                                                | 0.011                                         | -0.075                                |
|                                    | (-0.020 - 0.017)                                                      | (-0.007 - 0.029)                              | (-0.169 - 0.018)                      |
|                                    | <i>P</i> =.89                                                         | <i>P</i> =.24                                 | <i>P</i> =.12                         |



|                           |                  |                  |                  |
|---------------------------|------------------|------------------|------------------|
| <i>Oncology</i>           | 0.018            | 0.029            | -0.027           |
|                           | (-0.008 - 0.044) | (0.002 - 0.056)  | (-0.117 - 0.063) |
|                           | <i>P</i> =.17    | <i>P</i> =.04    | <i>P</i> =.56    |
| <i>Neurological</i>       | 0.002            | 0.006            | -0.026           |
|                           | (-0.024 - 0.027) | (-0.022 - 0.034) | (-0.109 - 0.057) |
|                           | <i>P</i> =.90    | <i>P</i> =.68    | <i>P</i> =.55    |
| <i>Neonatal Intensive</i> | 0.005            | 0.002            | -0.058           |
|                           | (-0.017 - 0.027) | (-0.020 - 0.024) | (-0.185 - 0.069) |
|                           | <i>P</i> =.67    | <i>P</i> =.87    | <i>P</i> =.37    |

- a. Displays the coefficient from the difference-in-differences estimate using ordinary least squares regression adjusted for control variables in Table 1 and with hospital and calendar year fixed effects. Results account for staggered entry into the 340B program. The sample comprises non-critical access hospitals.
- b. 95% Confidence intervals are calculated using standard errors clustered at the hospital level.
- c. Denotes number of hospitals in the sample.

**eTable 3. Difference-in-Differences Estimates Using Logistic Regression**

|                               | Difference-in-Differences Estimate <sup>a</sup> (95% CI) <sup>b</sup> |                                                 |                                       |
|-------------------------------|-----------------------------------------------------------------------|-------------------------------------------------|---------------------------------------|
|                               | Overall<br>(n=1,630) <sup>c</sup><br>(1)                              | By Hospital Ownership                           |                                       |
|                               |                                                                       | Not-for-Profit<br>(n=1,387) <sup>c</sup><br>(2) | Public<br>(n=243) <sup>c</sup><br>(3) |
| <b>Substance Use</b>          | 0.021                                                                 | 0.009                                           | 0.086                                 |
|                               | (-0.005 - 0.046)                                                      | (-0.020 - 0.038)                                | (0.033 - 0.138)                       |
|                               | <i>P</i> =.116                                                        | <i>P</i> =.54                                   | <i>P</i> =.001                        |
| <b>Inpatient Psychiatric</b>  | 0.037                                                                 | 0.026                                           | 0.092                                 |
|                               | (0.003 - 0.072)                                                       | (-0.013 - 0.064)                                | (0.009 - 0.175)                       |
|                               | <i>P</i> =.04                                                         | <i>P</i> =.19                                   | <i>P</i> =.03                         |
| <b>Outpatient Psychiatric</b> | 0.023                                                                 | 0.025                                           | 0.003                                 |
|                               | (-0.011 - 0.058)                                                      | (-0.013 - 0.064)                                | (-0.082 - 0.088)                      |
|                               | <i>P</i> =.18                                                         | <i>P</i> =.20                                   | <i>P</i> =.95                         |
| <b>Burn Care</b>              | 0.009                                                                 | 0.002                                           | 0.027                                 |
|                               | (-0.011 - 0.028)                                                      | (-0.018 - 0.022)                                | (-0.029 - 0.083)                      |
|                               | <i>P</i> =.39                                                         | <i>P</i> =.87                                   | <i>P</i> =.35                         |
| <b>Obstetrics</b>             | 0.024                                                                 | 0.022                                           | 0.023                                 |
|                               | (0.004 - 0.044)                                                       | (0.000 - 0.044)                                 | (-0.026 - 0.072)                      |
|                               | <i>P</i> =.02                                                         | <i>P</i> =.05                                   | <i>P</i> =.36                         |
| <b>Cardiac Surgery</b>        | -0.003                                                                | 0.004                                           | -0.038                                |
|                               | (-0.026 - 0.019)                                                      | (-0.021 - 0.028)                                | (-0.100 - 0.024)                      |
|                               | <i>P</i> =.77                                                         | <i>P</i> =.76                                   | <i>P</i> =.23                         |
| <b>Orthopedic</b>             | -0.004                                                                | -0.004                                          | -0.009                                |
|                               | (-0.018 - 0.011)                                                      | (-0.020 - 0.012)                                | (-0.055 - 0.037)                      |
|                               | <i>P</i> =.63                                                         | <i>P</i> =.61                                   | <i>P</i> =.71                         |
| <b>Oncology</b>               | 0.026                                                                 | 0.036                                           | -0.011                                |
|                               | (0.002 - 0.050)                                                       | (0.009 - 0.063)                                 | (-0.071 - 0.050)                      |
|                               | <i>P</i> =.04                                                         | <i>P</i> =.008                                  | <i>P</i> =.73                         |
| <b>Neurological</b>           | 0.001                                                                 | 0.000                                           | -0.015                                |
|                               | (-0.024 - 0.026)                                                      | (-0.027 - 0.027)                                | (-0.074 - 0.044)                      |
|                               | <i>P</i> =.92                                                         | <i>P</i> =.99                                   | <i>P</i> =.62                         |
| <b>Neonatal Intensive</b>     | 0.051                                                                 | 0.057                                           | 0.013                                 |
|                               | (0.022 - 0.081)                                                       | (0.024 - 0.089)                                 | (-0.077 - 0.103)                      |
|                               | <i>P</i> =.001                                                        | <i>P</i> =.001                                  | <i>P</i> =.78                         |

a. Displays the marginal effect from the difference-in-differences estimate using logistic regression adjusted for control variables in Table 1 and calendar year fixed effects.

b. 95% Confidence intervals are calculated using standard errors clustered at the hospital level.

c. Denotes number of hospitals in the sample.

**eTable 4. Difference-in-Differences Estimates by Whether Hospital Offered Service at Start of the Study Period**

|                               | Difference-in-Differences Estimate <sup>a</sup> (95% CI) <sup>b</sup> |                       |                    |                         |                       |                     |
|-------------------------------|-----------------------------------------------------------------------|-----------------------|--------------------|-------------------------|-----------------------|---------------------|
|                               | Did Not Already Offer Service                                         |                       |                    | Already Offered Service |                       |                     |
|                               | Overall<br>(1)                                                        | Not-for-Profit<br>(2) | Public<br>(3)      | Overall<br>(4)          | Not-for-Profit<br>(5) | Public<br>(6)       |
| <i>Substance Use</i>          | −0.002                                                                | −0.008                | 0.022              | 0.123                   | 0.100                 | 0.590 <sup>c</sup>  |
|                               | (−0.019 - 0.014)                                                      | (−0.026 - 0.010)      | (−0.033 - 0.076)   | (−0.009 - 0.254)        | (−0.029 - 0.230)      | (−0.073 - 1.252)    |
|                               | <i>P</i> =.78                                                         | <i>P</i> =.38         | <i>P</i> =.43      | <i>P</i> =.07           | <i>P</i> =.13         | <i>P</i> =.08       |
| <i>Inpatient Psychiatric</i>  | −0.004                                                                | −0.026                | 0.113              | 0.011                   | −0.002                | −0.111 <sup>c</sup> |
|                               | (−0.037 - 0.029)                                                      | (−0.060 - 0.007)      | (0.022 - 0.204)    | (−0.020 - 0.043)        | (−0.033 - 0.028)      | (−0.326 - 0.103)    |
|                               | <i>P</i> =.82                                                         | <i>P</i> =.13         | <i>P</i> =.02      | <i>P</i> =.49           | <i>P</i> =.89         | <i>P</i> =.31       |
| <i>Outpatient Psychiatric</i> | 0.000                                                                 | 0.010                 | −0.008             | 0.064                   | 0.041                 | 0.927 <sup>c</sup>  |
|                               | (−0.035 - 0.035)                                                      | (−0.026 - 0.047)      | (−0.106 - 0.090)   | (0.007 - 0.121)         | (−0.018 - 0.101)      | (0.366 - 1.487)     |
|                               | <i>P</i> =.99                                                         | <i>P</i> =.58         | <i>P</i> =.88      | <i>P</i> =.03           | <i>P</i> =.17         | <i>P</i> =.001      |
| <i>Burn Care</i>              | −0.005                                                                | −0.008                | 0.024              | −0.609                  | 0.350 <sup>c</sup>    | −0.066 <sup>c</sup> |
|                               | (−0.015 - 0.005)                                                      | (−0.019 - 0.004)      | (−0.011 - 0.059)   | (−2.014 - 0.797)        | (−0.110 - 0.809)      | (−0.207 - 0.075)    |
|                               | <i>P</i> =.31                                                         | <i>P</i> =.19         | <i>P</i> =.18      | <i>P</i> =.40           | <i>P</i> =.14         | <i>P</i> =.36       |
| <i>Obstetrics</i>             | −0.030                                                                | −0.037                | 0.000 <sup>c</sup> | 0.027                   | 0.022                 | 0.056               |
|                               | (−0.100 - 0.039)                                                      | (−0.097 - 0.023)      | (−0.462 - 0.462)   | (0.008 - 0.045)         | (0.002 - 0.041)       | (0.007 - 0.105)     |
|                               | <i>P</i> =.39                                                         | <i>P</i> =.23         | <i>P</i> =.99      | <i>P</i> =.004          | <i>P</i> =.03         | <i>P</i> =.03       |
| <i>Cardiac Surgery</i>        | −0.019                                                                | −0.025                | −0.007             | −0.005                  | −0.004                | 0.113 <sup>c</sup>  |
|                               | (−0.037 - −0.000)                                                     | (−0.046 - −0.004)     | (−0.078 - 0.063)   | (−0.032 - 0.021)        | (−0.031 - 0.022)      | (−0.494 - 0.721)    |
|                               | <i>P</i> =.05                                                         | <i>P</i> =.02         | <i>P</i> =.84      | <i>P</i> =.70           | <i>P</i> =.74         | <i>P</i> =.71       |
| <i>Orthopedic</i>             | 0.117                                                                 | 0.236                 | −0.283             | −0.006                  | −0.004                | −0.016 <sup>c</sup> |
|                               | (−0.052 - 0.285)                                                      | (−0.023 - 0.495)      | (−0.567 - 0.001)   | (−0.018 - 0.005)        | (−0.016 - 0.008)      | (−0.075 - 0.043)    |
|                               | <i>P</i> =.17                                                         | <i>P</i> =.07         | <i>P</i> =.05      | <i>P</i> =.30           | <i>P</i> =.51         | <i>P</i> =.60       |
| <i>Oncology</i>               | 0.081                                                                 | 0.101                 | 0.061              | 0.000                   | 0.008                 | 0.002               |
|                               | (0.004 - 0.159)                                                       | (0.007 - 0.196)       | (−0.097 - 0.220)   | (−0.019 - 0.019)        | (−0.014 - 0.029)      | (−0.069 - 0.074)    |
|                               | <i>P</i> =.04                                                         | <i>P</i> =.04         | <i>P</i> =.45      | <i>P</i> =.99           | <i>P</i> =.47         | <i>P</i> =.96       |

|                           |                  |                  |                  |                  |                  |                    |
|---------------------------|------------------|------------------|------------------|------------------|------------------|--------------------|
| <i>Neurological</i>       | 0.005            | -0.001           | 0.007            | -0.006           | -0.003           | 0.030              |
|                           | (-0.060 - 0.070) | (-0.087 - 0.085) | (-0.108 - 0.122) | (-0.027 - 0.014) | (-0.026 - 0.019) | (-0.048 - 0.108)   |
|                           | <i>P</i> =.89    | <i>P</i> =.98    | <i>P</i> =.90    | <i>P</i> =.55    | <i>P</i> =.78    | <i>P</i> =.45      |
| <i>Neonatal Intensive</i> | 0.015            | 0.010            | -0.010           | -0.012           | -0.025           | 0.906 <sup>c</sup> |
|                           | (-0.009 - 0.039) | (-0.016 - 0.036) | (-0.103 - 0.083) | (-0.050 - 0.027) | (-0.063 - 0.013) | (0.110 - 1.702)    |
|                           | <i>P</i> =.23    | <i>P</i> =.45    | <i>P</i> =.84    | <i>P</i> =.55    | <i>P</i> =.20    | <i>P</i> =.03      |

- a. Displays the coefficient from the difference-in-differences estimate using ordinary least squares regression adjusted for control variables in Table 1 and with hospital and calendar year fixed effects. Results account for staggered entry into the 340B program. The sample comprises non-critical access hospitals.
- b. 95% Confidence intervals are calculated using standard errors clustered at the hospital level.
- c. Sample size is less than 100 hospitals.

## **References**

1. Paul R, Arif A, Pokhrel K, Ghosh S. The association of social determinants of health with COVID-19 mortality in rural and urban counties. *J Rural Health*. 2021;37(2):278-286.
2. Singh GK, Daus GP, Allender M, et al. Social determinants of health in the United States: addressing major health inequality trends for the nation, 1935-2016. *International Journal of MCH and AIDS*. 2017;6(2):139.
3. Hardy RY, Liu GC, Kelleher K. Contribution of social determinant of health factors to rural-urban preventive care differences among medicaid enrollees. *Academic Pediatrics*. 2021;21(1):93-100.
4. Agency for Healthcare Research and Quality. SDOH Database (v1) from Centers for Disease Control and Prevention Agency for Toxic Substances and Disease Registry Geospatial Research, Analysis, and Services Program. Social Vulnerability Index 2018, 2016, 2014, and 2010. Accessed November 17, 2022, [https://www.atsdr.cdc.gov/placeandhealth/svi/data\\_documentation\\_download.html](https://www.atsdr.cdc.gov/placeandhealth/svi/data_documentation_download.html)
5. Centers for Disease Control and Prevention. CDC SVI Documentation 2018. [https://www.atsdr.cdc.gov/placeandhealth/svi/documentation/SVI\\_documentation\\_2018.html](https://www.atsdr.cdc.gov/placeandhealth/svi/documentation/SVI_documentation_2018.html)
6. Callaway B, Sant'Anna PH. Difference-in-differences with multiple time periods. *J Econom*. 2021;225(2):200-230.
7. Baker AC, Larcker DF, Wang CC. How much should we trust staggered difference-in-differences estimates? *Journal of Financial Economics*. 2022;144(2):370-395.
