# Supplementary material for: US Hospital Service Availability and New 340B Program Participation
Source: PubMed Central journal article supplement (PMC11069079; doi:10.1001/jamahealthforum.2024.0833), 2024-05-03
Supplement: jamahealthforum-e240833-s002.pdf [file jamahealthforum-e240833-s002.pdf]

## Data Sharing Statement

Owsley. US Hospital Service Availability and New 340B Program Participation. *JAMA Health Forum*. Published May 03, 2024. doi:10.1001/jamahealthforum.2024.0833

### Data

**Data available:** No

### Additional Information

**Explanation for why data not available:** The American Hospital Association Survey data is proprietary and unavailable for public release.
